# Supplementary material
Source: MDPI journal article supplement (https://www.mdpi.com/2071-1050/13/3/1438)
Supplement: s1 [file s1]

## Supplementary Material

**Table S1:** Introductory FEW Nexus Course Schedule Summary

| Introductory FEW Nexus Course Schedule Summary |                                                                                                                                             |                                                                                                                           |                                                                                                                                                                                                                                                                                                                    |                                                                                                                           |
|------------------------------------------------|---------------------------------------------------------------------------------------------------------------------------------------------|---------------------------------------------------------------------------------------------------------------------------|--------------------------------------------------------------------------------------------------------------------------------------------------------------------------------------------------------------------------------------------------------------------------------------------------------------------|---------------------------------------------------------------------------------------------------------------------------|
|                                                | Cohort 1                                                                                                                                    |                                                                                                                           | Cohort 2                                                                                                                                                                                                                                                                                                           |                                                                                                                           |
| Session                                        | Lecture Topic & In-class Activity                                                                                                           | Student Activities                                                                                                        | Lecture Topic & In-class Activity                                                                                                                                                                                                                                                                                  | Student Activities                                                                                                        |
| # 1                                            | Course overview<br><br>Uncovering the Food-Energy-Water Nexus                                                                               |                                                                                                                           | Course overview<br><br>Uncovering the Food-Energy-Water Nexus                                                                                                                                                                                                                                                      | Students present a 5-minute lightning round on their own research                                                         |
| # 2                                            | Systems Thinking at the Food-Energy-Water Nexus<br><br>Systems Thinking Game<br><br>Discuss topics and guidelines for two-page policy memos | Discussion comment on the online discussion board due before class                                                        | Systems Thinking at the Food-Energy-Water Nexus<br><br>Systems Thinking Game<br><br>Discuss topics and guidelines for two-page policy memos                                                                                                                                                                        | Discussion comment on the online discussion board due before class                                                        |
| # 3                                            | Water-Food Intersections (Guest speaker, USDA expert)                                                                                       | Topic for two-page policy memo due before class<br><br>Discussion comment on the online discussion board due before class | Climate Change Impacts on Food-Energy-Water Systems<br><br>“Climate Change and Impaired Population Health: Perspectives from Countries on Opposite Ends of the Economic Spectrum”. Guest Speaker: School of Public Health faculty<br><br>Food-Energy-Water Systems as An Opportunity for Mitigation and Adaptation | Topic for two-page policy memo due before class<br><br>Discussion comment on the online discussion board due before class |
| # 4                                            | No class due to snow day; field trip rescheduled                                                                                            | Topics for Case Study, Groups 1 and 2, due<br><br>Discussion comment on the online discussion board due before class      | Water-Food Intersections: Interdisciplinary Research within the CONSERVE Center of Excellence<br><br>Panel Discussion: What are the benefits and challenges of working in an interdisciplinary Center? What do we know now that we wish we knew when we formed the Center?                                         | Discussion comment on the online discussion board due before class                                                        |

|     |                                                                                                                                                                                                                 |                                                                                                                                                      |                                                                                                                                                                                                                                                                                          |                                                                    |
|-----|-----------------------------------------------------------------------------------------------------------------------------------------------------------------------------------------------------------------|------------------------------------------------------------------------------------------------------------------------------------------------------|------------------------------------------------------------------------------------------------------------------------------------------------------------------------------------------------------------------------------------------------------------------------------------------|--------------------------------------------------------------------|
|     |                                                                                                                                                                                                                 |                                                                                                                                                      | Guest speakers: co-Project Directors and collaborators on the CONSERVE project.                                                                                                                                                                                                          |                                                                    |
| # 5 | Food/Waste-Energy Intersections<br><br>Lightning rounds on two-page policy memos                                                                                                                                | Two-page policy memo due<br><br>Students present a 5-minute lightning round on their policy memo                                                     | Lightning rounds on two-page policy memos<br><br>Food/Waste-Energy Intersections                                                                                                                                                                                                         | Students present a 5-minute lightning round on their policy memo   |
| # 6 | Off-Campus Field trip to a Forest Farm                                                                                                                                                                          | Discussion comment on the online discussion board due before class                                                                                   | Introduction to Group Dynamics<br>Guest Speaker – Global STEWARDS Co-PI, Instructor of the Data Practicum course that students will take in the fall<br><br>Brainstorming topics for the Interdisciplinary FEW Systems Projects                                                          |                                                                    |
| # 7 | Interdisciplinary FEW Case Studies: Group 1 and 2                                                                                                                                                               | Discussion comment on the online discussion board due before class<br><br>Groups 1 and 2 present on their Interdisciplinary FEW Case Study (20 mins) | Social/Behavioral Dimensions of the Food-Energy-Water Nexus<br><br>Discuss topics and guidelines for short research paper<br><br>Rapid Ethnographic Assessments: A Practical Approach For Collaborative Community Research<br>Guest Speaker: Faculty from the Department of Anthropology | Discussion comment on the online discussion board due before class |
| # 8 | On-Campus Field trip: Exploration of on-campus sites employing water reuse for food production and other irrigation activities<br>Guest speaker: Faculty in the Department of Civil & Environmental Engineering | Discussion comment on the online discussion board due before class                                                                                   | On-Campus Field trip: CANCELLED due to coronavirus preventative measures                                                                                                                                                                                                                 | CANCELLED                                                          |
| # 9 | Discuss topics and guidelines for short research paper<br><br>Economics of the Food-Energy-Water Nexus<br>Guest speakers: UMD Professor and visiting                                                            | Discussion comment on the online discussion board due before class                                                                                   | Stormwater reuse/treatment<br><br>(Class held virtually)<br><br>Discussion on transition to online learning                                                                                                                                                                              | Discussion comment on the online discussion board due before class |

|      |                                                                                                                                                                                       |                                                                                                                      |                                                                                                                                                                                                                                                                                                                                                                                               |                                                                                                          |
|------|---------------------------------------------------------------------------------------------------------------------------------------------------------------------------------------|----------------------------------------------------------------------------------------------------------------------|-----------------------------------------------------------------------------------------------------------------------------------------------------------------------------------------------------------------------------------------------------------------------------------------------------------------------------------------------------------------------------------------------|----------------------------------------------------------------------------------------------------------|
|      | professor from Texas A&M University                                                                                                                                                   |                                                                                                                      | Discuss topics and guidelines for short research paper.<br><br>Stormwater reuse/treatment for irrigation and other applications, Guest speaker: Faculty in the Department of Civil & Environmental Engineering<br><br>Forming Interdisciplinary FEW Systems Project Teams, Guest Speaker – Global STEWARDS Co-PI, Instructor of the Data Practicum course that students will take in the fall |                                                                                                          |
| # 10 | Off-Campus Field Trip: Energy-Water innovations in the Town of Emmitsburg, MD                                                                                                         | Short research paper topic due<br><br>Discussion comment on the online discussion board due before class             | Off-Campus Field Trip CANCELLED<br><br>Energy-Water Intersections (Class held virtually)<br><br>Energy-Water Intersections and Innovations in the Town of Emmitsburg, MD                                                                                                                                                                                                                      | Short research paper topic due<br><br>Discussion comment on the online discussion board due before class |
| # 11 | Global Perspectives: Emerging FEW Innovations in Nepal and Israel<br><br>Guest speakers: Faculty from Kathmandu University and the Arava Institute for Environmental Studies (Israel) | Topics for Case Study, Groups 3 and 4, due<br><br>Discussion comment on the online discussion board due before class | Global Perspectives: Emerging FEW Systems Innovations Around the Globe<br><br>(Class held virtually)<br><br>Guest speaker: Researcher from NGO in Nepal<br><br>Guest speaker: Faculty from the Department of Atmospheric and Oceanic Science                                                                                                                                                  | Discussion comment on the online discussion board due before class                                       |
| # 12 | Climate Change: FEW systems as an opportunity for mitigation and adaptation. Guest speaker: USDA expert<br><br>Lightning rounds on two-page policy memo                               | Short research paper due<br><br>Students present a 5-minute lightning round on their short research paper            | Policy and Governance at the FEW Nexus<br><br>(Class held virtually)<br><br>Guest Speaker: Faculty from the School of Public                                                                                                                                                                                                                                                                  | Short research paper due                                                                                 |

|      |                                                              |                                                                                                                                                      |                                                                                                                                                      |                                                                                                                        |
|------|--------------------------------------------------------------|------------------------------------------------------------------------------------------------------------------------------------------------------|------------------------------------------------------------------------------------------------------------------------------------------------------|------------------------------------------------------------------------------------------------------------------------|
| # 13 | Governance<br>Guest Speaker: School of Public Health faculty | Discussion comment on the online discussion board due before class                                                                                   | Off-Campus Field trip<br>CANCELLED<br><br>Forests, The Future of Food Systems. Guest Speaker: Expert on Forest farming<br><br>(Class held virtually) | Discussion comment on the online discussion board due before class                                                     |
| # 14 | Interdisciplinary FEW Case Studies – group 3 and 4           | Discussion comment on the online discussion board due before class<br><br>Groups 3 and 4 present on their Interdisciplinary FEW Case Study (20 mins) | Interdisciplinary FEW Systems Project Pitches<br><br>(Class held virtually)                                                                          | Students present 15-minute group project pitches that will become the projects that they complete in the fall semester |
